# Supplementary material for: Improving cardiovascular risk prediction through machine learning modelling of irregularly repeated electronic health records
Source: PubMed Central journal article supplement — Eur Heart J Digit Health. 2023 Oct 17;5(1):30–40. doi: 10.1093/ehjdh/ztad058 (PMC10802828; doi:10.1093/ehjdh/ztad058), 2023-10-17
Supplement: ztad058_supplementary_data.pdf [file ztad058_supplementary_data.pdf]

## Supplementary Materials

### Improving Cardiovascular Risk Prediction through Machine Learning Modelling of Irregular Repeated Electronic Health Records

|                                     |                                                                                                                       |    |
|-------------------------------------|-----------------------------------------------------------------------------------------------------------------------|----|
| Supplementary Figure S1             | The inclusion and exclusion of eligible participants .....                                                            | 2  |
| Supplementary Figure S2             | Flowchart of the study population in training and validation sets.....                                                | 3  |
| Supplementary Table S1              | The descriptions and sources of the predictors included in the study.....                                             | 4  |
| Supplementary Table S2              | The definition of medication history.....                                                                             | 5  |
| Supplementary Table S3              | Normal ranges of predictors.....                                                                                      | 6  |
| Supplementary Table S4              | Predictors inputted in the two machine learning models .....                                                          | 7  |
| Supplementary Table S5              | The selection ranges of hyperparameters in the two machine learning models.....                                       | 8  |
| Supplementary Table S6              | Characteristics of the training and validation sets <sup>a</sup> .....                                                | 9  |
| Supplementary Table S7              | The missing proportions of predictors <sup>a</sup> .....                                                              | 11 |
| Supplementary Table S8              | The median time intervals between measurements of key predictors .....                                                | 12 |
| Supplementary Table S9              | Hyperparameters of XGBoost models and LASSO regression model <sup>a</sup> .....                                       | 13 |
| Supplementary Figure S3             | The structures of the first tree in each XGBoost model .....                                                          | 14 |
| Supplementary Table S10             | Fifteen $\beta$ coefficients with largest absolute value in each LASSO regressions.....                               | 15 |
| Supplementary Table S10 (Continued) | $\beta$ coefficients of the LASSO regression .....                                                                    | 16 |
| Supplementary Figure S4             | Decision curve analysis of the ML models .....                                                                        | 17 |
| Supplementary Table S11             | Associations between predictors and ASCVDa.....                                                                       | 18 |
| Supplementary Table S11             | Associations between predictors and ASCVD (continued) <sup>a</sup> .....                                              | 19 |
| Supplementary Figure S5             | The importance of predictors in the two ML models .....                                                               | 20 |
| Supplementary Table S12             | The differences of C statistics between ML models and Cox model with all the baseline measurements <sup>a</sup> ..... | 21 |
| Supplementary Figure S6             | Calibration plots of models in sensitivity analysis <sup>a</sup> .....                                                | 22 |
| Supplementary Table S13             | The difference in C statistic between ML models and recalibrated China-PAR model <sup>a</sup> ..                      | 23 |
| Supplementary Appendix              | The TRIPODS checklist for this study <sup>a</sup> .....                                                               | 24 |
| Supplementary Method S1             | Detailed description of the CHERRY study.....                                                                         | 26 |
| Supplementary Method S2             | Imputation strategies to handle missing values in this study.....                                                     | 30 |

## Supplementary Figure S1 The inclusion and exclusion of eligible participants

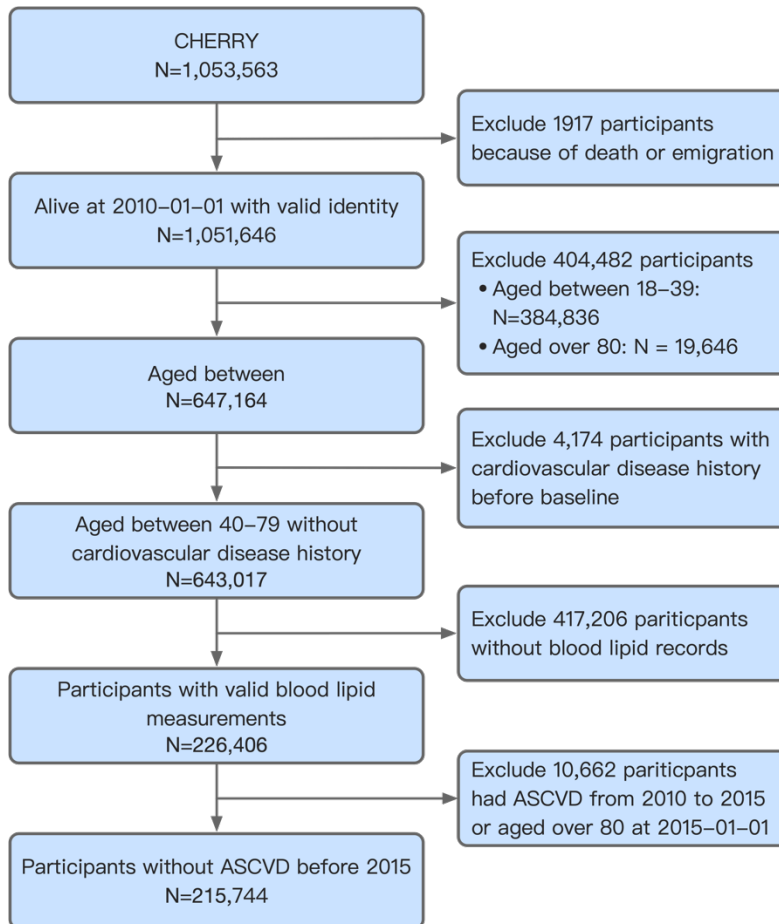

**Supplementary Figure S2 Flowchart of the study population in training and validation sets**

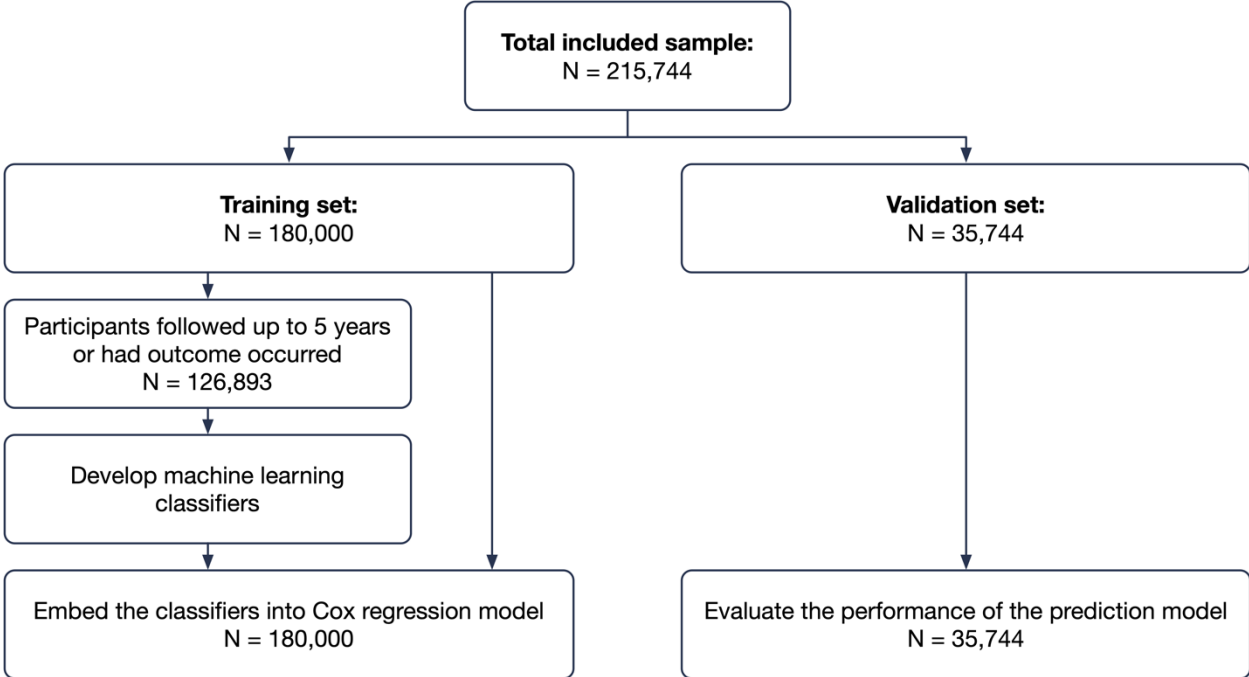

**Supplementary Table S1 The descriptions and sources of the predictors included in the study**

| <b>Predictor</b>                                                                | <b>Description</b>                                                                                                                                                                                | <b>Sources</b>                                                                           |
|---------------------------------------------------------------------------------|---------------------------------------------------------------------------------------------------------------------------------------------------------------------------------------------------|------------------------------------------------------------------------------------------|
| Settings                                                                        | Dichotomous, rural or urban                                                                                                                                                                       | Census data and health insurance databases                                               |
| Smoke status                                                                    | Dichotomous, current or not current                                                                                                                                                               | Self-reported from GP's survey                                                           |
| Family history of ASCVD                                                         | Dichotomous, with or without                                                                                                                                                                      | Self-reported from GP's survey                                                           |
| Education level                                                                 | Multiple levels: primary school of lower, middle school, college or above                                                                                                                         | Census data and health insurance databases                                               |
| Baseline diabetes                                                               | Dichotomous, with or without, defined as E10-14 of ICD-10 code                                                                                                                                    | EMR, health check, disease surveillance, and chronic disease management system databases |
| Anthropometrics (blood pressure, BMI, and waist circumference)                  | Continuous, units: mmHg (blood pressure); kg/m <sup>2</sup> (BMI); waist circumference (cm)                                                                                                       | Chronic disease management system and health check databases                             |
| Laboratory tests (serum lipids, glucose, urinary albumin, and blood creatinine) | Continuous, units: mmol/L (TC, TG, HDL-C, LDL-C, FBG), mg/dL (Apo-a, Apo-b, Lp-(a), urinary albumin), % (HbA1c), μmol/L (blood creatinine); eGFR was calculated according to the CKD-EPI equation | In-patients' EMR, health check, and chronic disease management system databases          |
| Medication history                                                              | Dichotomous, with or without                                                                                                                                                                      | In-patients' EMR, health check, and chronic disease management system databases          |

**Supplementary Table S2 The definition of medication history**

| <b>Treatments</b>  | <b>Definitions</b>                                                                                                                                                                                                                                                                                                                         |
|--------------------|--------------------------------------------------------------------------------------------------------------------------------------------------------------------------------------------------------------------------------------------------------------------------------------------------------------------------------------------|
| Anti-hypertension  | Ever used the following medications before baseline: angiotensin converting enzyme (ACE) inhibitors, beta-blockers, thiazide, angiotensin II receptor blockers (ARB), calcium channel blockers, and alpha-blockers.                                                                                                                        |
| Lipid-lowering     | Ever used the following medications before baseline: statins, nicotinic acid, cholesterol absorption inhibitors, probucol, cholic acid chelating agent, and fibrates.                                                                                                                                                                      |
| Anti-hyperglycemia | Ever used the following medications before baseline: biguanides, sulfonylureas, non-sulfonylurea derivatives of anisic acid, alpha-glucosidase inhibitors, thiazolidinediones, glucagon-like peptide 1 (GLP-1) receptor agonist, dipeptidyl peptidase IV (DPP-4) inhibitors, sodium-glucose transporter 2 (SGLT2) inhibitors, and insulin. |
| Aspirin            | Ever used Aspirin before baseline.                                                                                                                                                                                                                                                                                                         |

**Supplementary Table S3 Normal ranges of predictors**

| <b>Predictor</b>    | <b>Unit</b>       | <b>Normal ranges</b>             |
|---------------------|-------------------|----------------------------------|
| HDL-C               | mmol/L            | (0,10], $0 < \text{var} \leq 10$ |
| LDL-C               | mmol/L            | (0,20]                           |
| TC                  | mmol/L            | (0,20]                           |
| TG                  | mmol/L            | (0,20]                           |
| HbA <sub>1c</sub>   | %                 | [4,15]                           |
| Height              | cm                | [80,250]                         |
| Weight              | kg                | [10,300]                         |
| BMI                 | kg/m <sup>2</sup> | [10,80]                          |
| Systolic pressure   | mmHg              | [70,270]                         |
| Dialytic pressure   | mmHg              | [30,150]                         |
| Waist circumference | cm                | [50,130]                         |

**Supplementary Table S4 Predictors inputted in the two machine learning models**

|                                  | China-<br>PAR | Baseline | Repeated measurements-based Variables |      |                       |       |
|----------------------------------|---------------|----------|---------------------------------------|------|-----------------------|-------|
|                                  |               |          | Number of<br>measurements             | Mean | Standard<br>deviation | Range |
| <b><i>Demography</i></b>         |               |          |                                       |      |                       |       |
| Sex                              | √             | √        |                                       |      |                       |       |
| Age                              | √             | √        |                                       |      |                       |       |
| Smoking status                   | √             | √        |                                       |      |                       |       |
| Education level                  |               | √        |                                       |      |                       |       |
| Settings                         | √             | √        |                                       |      |                       |       |
| Family history of ASCVD          | √             | √        |                                       |      |                       |       |
| <b><i>Blood pressure</i></b>     |               |          |                                       |      |                       |       |
| SBP                              | √             | √        | √                                     | √    | √                     | √     |
| DBP                              |               | √        | √                                     | √    | √                     | √     |
| <b><i>Obesity</i></b>            |               |          |                                       |      |                       |       |
| BMI                              |               | √        | √                                     | √    | √                     | √     |
| Waist circumference              | √             | √        | √                                     | √    | √                     | √     |
| <b><i>Lipid metabolism</i></b>   |               |          |                                       |      |                       |       |
| TC                               | √             | √        | √                                     | √    | √                     | √     |
| TG                               |               | √        | √                                     | √    | √                     | √     |
| HDL-C                            | √             | √        | √                                     | √    | √                     | √     |
| LDL-C                            |               | √        | √                                     | √    | √                     | √     |
| Apo-a                            |               | √        | √                                     | √    | √                     | √     |
| Apo-b                            |               | √        | √                                     | √    | √                     | √     |
| Lp-a                             |               | √        | √                                     | √    | √                     | √     |
| <b><i>Glucose metabolism</i></b> |               |          |                                       |      |                       |       |
| FBG                              |               | √        | √                                     | √    | √                     | √     |
| Diabetes                         | √             | √        |                                       |      |                       |       |
| HbA1c                            |               | √        | √                                     | √    | √                     | √     |
| <b><i>Renal function</i></b>     |               |          |                                       |      |                       |       |
| eGFR                             |               | √        | √                                     | √    | √                     | √     |
| ACR                              |               | √        | √                                     | √    | √                     | √     |
| <b><i>Medication</i></b>         |               |          |                                       |      |                       |       |
| Anti-hypertension                | √             | √        |                                       |      |                       |       |
| Anti-hyperlipidemia              |               | √        |                                       |      |                       |       |
| Anti-hyperglycemia               |               | √        |                                       |      |                       |       |
| Aspirin                          |               | √        |                                       |      |                       |       |

**Supplementary Table S5 The selection ranges of hyperparameters in the two machine learning models**

| <b>Hyperparameters</b>                               | <b>Range</b>                                 |
|------------------------------------------------------|----------------------------------------------|
| XGBoost                                              |                                              |
| Maximum tree depth                                   | 6, 7, 8, 9, 10                               |
| Learning rate                                        | [0.01, 0.3]                                  |
| $\gamma$                                             | (0.0, 0.2]                                   |
| Subsample proportion                                 | [0.6, 0.9]                                   |
| Subspace proportion                                  | [0.5, 0.8]                                   |
| Minimum children nodes weight                        | 1, 2, 3, 4, 5, 6, 7, 8, 9, 10                |
| LASSO                                                |                                              |
| Lambda (Grid search for 500 values within the range) | $[6.47 \times 10^{-5}, 3.84 \times 10^{-2}]$ |



**Supplementary Table S6 Characteristics of the training and validation sets<sup>a</sup>**

|                                 | <b>Overall (N = 215,744)</b> | <b>Training (n = 180,000)</b> | <b>Validation (n = 35,744)</b> | <b>Statistic (P)</b> |
|---------------------------------|------------------------------|-------------------------------|--------------------------------|----------------------|
| <b>Demographic attributes</b>   |                              |                               |                                |                      |
| Female                          | 115,666 (53.61)              | 96,568 (53.65)                | 19,098 (53.43)                 | 0.57 (0.452)         |
| Age, y                          | 56.70 (9.59)                 | 56.71 (9.60)                  | 56.65 (9.55)                   | -1.02 (0.307)        |
| Rural                           | 65,086 (30.34)               | 54,417 (30.41)                | 10,669 (30.01)                 | 2.16 (0.141)         |
| Current smokers                 | 57,961 (26.87)               | 48,366 (26.87)                | 9,595 (26.84)                  | 0.01 (0.923)         |
| Finished High school            | 108,120 (50.11)              | 90,207 (50.11)                | 17,913 (50.11)                 | 0.00 (0.999)         |
| Family history of ASCVD         | 1,318 (0.61)                 | 1,125 (0.62)                  | 193 (0.54)                     | 399.41 (0.065)       |
| <b>Body measurements</b>        |                              |                               |                                |                      |
| Waist circumference, cm         | 81.76 (7.94)                 | 81.77 (7.95)                  | 81.69 (7.85)                   | -1.59 (0.111)        |
| BMI, kg/m <sup>2</sup>          | 23.31 (2.87)                 | 23.31 (2.88)                  | 23.32 (2.85)                   | 0.21 (0.834)         |
| <b>Blood pressure</b>           |                              |                               |                                |                      |
| SBP, mmHg                       | 134.45 (16.64)               | 134.45 (16.64)                | 134.45 (16.62)                 | -0.03 (0.975)        |
| DBP, mmHg                       | 82.63 (9.87)                 | 82.62 (9.88)                  | 82.65 (9.77)                   | 0.43 (0.670)         |
| <b>Lipid profiles</b>           |                              |                               |                                |                      |
| Total cholesterol, mmol/L       | 4.90 (0.98)                  | 4.90 (0.98)                   | 4.91 (0.99)                    | <b>2.06 (0.039)</b>  |
| HDL-C, mmol/L                   | 1.30 (0.34)                  | 1.30 (0.34)                   | 1.30 (0.34)                    | 0.87 (0.385)         |
| TG, mmol/L                      | 1.61 (1.09)                  | 1.61 (1.09)                   | 1.61 (1.09)                    | -0.01 (0.994)        |
| LDL-C, mmol/L                   | 2.84 (0.82)                  | 2.84 (0.82)                   | 2.84 (0.83)                    | 0.88 (0.378)         |
| Apo-A (mmol/L)                  | 1.22 (0.27)                  | 1.22 (0.27)                   | 1.23 (0.27)                    | 1.09 (0.274)         |
| Apo-B (mmol/L)                  | 0.95 (0.25)                  | 0.95 (0.25)                   | 0.95 (0.25)                    | 1.43 (0.154)         |
| Lp-(a) (mg/dL)                  | 174.17 (184.38)              | 173.85 (184.23)               | 175.76 (185.14)                | 1.07 (0.283)         |
| <b>Glycemia</b>                 |                              |                               |                                |                      |
| FBG, mmol/L                     | 5.67 (1.57)                  | 5.67 (1.56)                   | 5.68 (1.64)                    | 0.82 (0.414)         |
| HbA1c, %                        | 6.86 (1.90)                  | 6.86 (1.91)                   | 6.85 (1.89)                    | -0.37 (0.712)        |
| Diabetes mellitus               | 26,090 (12.09)               | 21,666 (12.04)                | 4,424 (12.38)                  | 3.22 (0.073)         |
| <b>Renal function</b>           |                              |                               |                                |                      |
| ACR, mg/g                       | 15.90 (45.36)                | 15.79 (45.99)                 | 16.42 (42.07)                  | 0.46 (0.642)         |
| eGFR, mL/min/1.73m <sup>2</sup> | 98.92 (15.30)                | 98.94 (15.29)                 | 98.86 (15.38)                  | -0.69 (0.488)        |

**Supplementary Table S6 Characteristics of the training and validation sets (continued)<sup>a</sup>**

|                                                              | Overall (N = 215,744) | Training (n = 180,000) | Validation (n = 35,744) | Statistic (P)       |
|--------------------------------------------------------------|-----------------------|------------------------|-------------------------|---------------------|
| <b>Medications</b>                                           |                       |                        |                         |                     |
| Anti-hypertension treatment                                  | 75,857 (35.16)        | 63,299 (35.17)         | 12,558 (35.13)          | 0.01 (0.910)        |
| Anti-hyperlipidemia treatment                                | 35,561 (16.48)        | 18,960 (10.53)         | 3,887 (10.87)           | 3.63 (0.057)        |
| Anti-hyperglycemia treatment                                 | 22,847 (10.59)        | 29,514 (16.40)         | 6,047 (16.92)           | <b>5.84 (0.016)</b> |
| Aspirin treatment                                            | 19,064 (8.84)         | 15,896 (8.83)          | 3,168 (8.86)            | 0.03 (0.854)        |
| <b>Outcomes</b>                                              |                       |                        |                         |                     |
| ASCVD events                                                 | 6,081 (2.82)          | 5,112 (2.84)           | 969 (2.71)              | 1.77 (0.184)        |
| Average follow-up time, years                                | 5.41 (1.36)           | 5.41 (1.36)            | 5.41 (1.36)             | -0.18 (0.861)       |
| Incidence rate of ASCVD,<br>per 10 <sup>6</sup> person-years | 6,178 (6177-6179)     | 6,225 (6224-6226)      | 5,944 (5943-5945)       | 1.36 (0.174)        |
| Kaplan-Meier survival                                        | 0.969 (0.968-0.970)   | 0.969 (0.968-0.970)    | 0.970 (0.968-0.972)     | 1.74 (0.187)        |

<sup>a</sup>Categorical variables were presented by counts and percentages, using the Chi-square test to compare differences; Continuous variables were presented by means and standard deviations, using Student's t-test to compare the difference. The difference in survival was given by the log-rank test.

**Supplementary Table S7 The missing proportions of predictors<sup>a</sup>**

|                                | Baseline | Repeated measurements-based Variables |       |                    |       |                                                |
|--------------------------------|----------|---------------------------------------|-------|--------------------|-------|------------------------------------------------|
|                                |          | Number of measurements                | Mean  | Standard deviation | Range | Difference between first and last measurements |
| <b>Demography</b>              |          |                                       |       |                    |       |                                                |
| Sex                            | 0        |                                       |       |                    |       |                                                |
| Age                            | 0        |                                       |       |                    |       |                                                |
| Smoking status                 | 0        |                                       |       |                    |       |                                                |
| Education level                | 6.5%     |                                       |       |                    |       |                                                |
| Settings                       | 0.6%     |                                       |       |                    |       |                                                |
| Family history of ASCVD        | 0        |                                       |       |                    |       |                                                |
| <b>Blood pressure</b>          |          |                                       |       |                    |       |                                                |
| SBP                            | 31.0%    | 42.4%                                 | 42.4% | 62.3%              | 42.4% | 42.4%                                          |
| DBP                            | 31.0%    | 42.4%                                 | 42.4% | 62.3%              | 42.4% | 42.4%                                          |
| <b>Obesity</b>                 |          |                                       |       |                    |       |                                                |
| BMI                            | 3.8%     | 35.9%                                 | 35.9% | 70.0%              | 35.9% | 35.9%                                          |
| Waist circumference            | 14.6%    | 39.3%                                 | 39.3% | 58.9%              | 39.3% | 39.3%                                          |
| <b>Lipid metabolism</b>        |          |                                       |       |                    |       |                                                |
| TC                             | 4.9%     | 4.9%                                  | 4.9%  | 31.3%              | 4.9%  | 4.9%                                           |
| TG                             | 4.5%     | 4.5%                                  | 4.5%  | 31.3%              | 4.5%  | 4.5%                                           |
| HDL-C                          | 4.6%     | 4.6%                                  | 4.6%  | 32.1%              | 4.6%  | 4.6%                                           |
| LDL-C                          | 5.1%     | 5.3%                                  | 5.3%  | 33.3%              | 5.3%  | 5.3%                                           |
| Apo-A                          | 50.1%    | 50.1%                                 | 50.1% | 74.8%              | 50.1% | 50.1%                                          |
| Apo-B                          | 50.1%    | 50.1%                                 | 50.1% | 74.8%              | 50.1% | 50.1%                                          |
| Lp-(a)                         | 63.7%    | 63.7%                                 | 63.7% | 83.4%              | 63.7% | 63.7%                                          |
| <b>Glucose metabolism</b>      |          |                                       |       |                    |       |                                                |
| FBG                            | 13.8%    | 14.0%                                 | 14.0% | 36.2%              | 14.0% | 14.0%                                          |
| HbA1c                          | 89.3%    | 89.4%                                 | 89.4% | 94.8%              | 89.4% | 89.4%                                          |
| Diabetes                       | 0        |                                       |       |                    |       |                                                |
| <b>Kidney function related</b> |          |                                       |       |                    |       |                                                |
| eGFR                           | 33.7%    | 33.8%                                 | 33.8% | 60.9%              | 33.8% | 33.8%                                          |
| ACR                            | 96.6%    | 96.2%                                 | 96.6% | 98.9%              | 96.6% | 96.6%                                          |
| <b>Medication</b>              |          |                                       |       |                    |       |                                                |
| Anti-hypertension              | 0        |                                       |       |                    |       |                                                |
| Anti-hyperlipidemia            | 0        |                                       |       |                    |       |                                                |
| Anti-hyperglycemia             | 0        |                                       |       |                    |       |                                                |
| Aspirin                        | 0        |                                       |       |                    |       |                                                |

<sup>a</sup>All the missing proportions were calculated in the whole study population of 215,744.

**Supplementary Table S8 The median time intervals between measurements of key predictors**

| <b>Predictor</b>        | <b>Median number (IQR) of measurements from each individual<sup>a</sup></b> | <b>Median (IQR) of the mean time interval between each measurement of each individual<sup>b</sup></b> | <b>Maximum (IQR) of the mean time interval between each measurement of each individual<sup>c</sup></b> |
|-------------------------|-----------------------------------------------------------------------------|-------------------------------------------------------------------------------------------------------|--------------------------------------------------------------------------------------------------------|
| Total cholesterol       | 3 (4)                                                                       | 269 days (337)                                                                                        | 559 days (418)                                                                                         |
| Systolic blood pressure | 2 (2)                                                                       | 136 days (384)                                                                                        | 320 days (694)                                                                                         |
| Body mass index         | 1 (1)                                                                       | 267 days (525)                                                                                        | 671 days (785)                                                                                         |
| Fasting blood glucose   | 3 (5)                                                                       | 251 days (371)                                                                                        | 536 days (458)                                                                                         |

<sup>a</sup> The median of the number of each individual's measurement.

<sup>b</sup> Mean time intervals of each individual's measurements were calculated first and the medians of each individual's mean were given above.

<sup>c</sup> Mean time intervals of each individual's measurements were calculated first and the maximums of each individual's mean were given above.

**Supplementary Table S9 Hyperparameters of XGBoost models and LASSO regression model<sup>a</sup>**

|                               | <b>Model 1</b> | <b>Model 2</b> | <b>Model 3</b> | <b>Model 4</b> | <b>Model 5</b> |
|-------------------------------|----------------|----------------|----------------|----------------|----------------|
| XGBoost                       |                |                |                |                |                |
| Maximum tree depth            | 3              | 5              | 5              | 3              | 3              |
| Learning rate                 | 0.0568         | 0.0203         | 0.0215         | 0.0971         | 0.0689         |
| $\gamma$                      | 0.191          | 0.138          | 0.0308         | 0.139          | 0.0336         |
| Subsample proportion          | 76.2%          | 69.6%          | 66.1%          | 73.4%          | 63.7%          |
| Subspace proportion           | 74.5%          | 58.4%          | 59.1%          | 63.0%          | 56.8%          |
| Minimum children nodes weight | 8              | 8              | 6              | 8              | 3              |
| LASSO                         |                |                |                |                |                |
| Lambda                        | 0.000638       | 0.000650       | 0.000650       | 0.000712       | 0.000662       |

<sup>a</sup>The five models were generated according to the five imputation subsets for predictors in the China-PAR model and repeated measurements derived predictors without being imputed.

# Supplementary Figure S3 The structures of the first tree in each XGBoost model

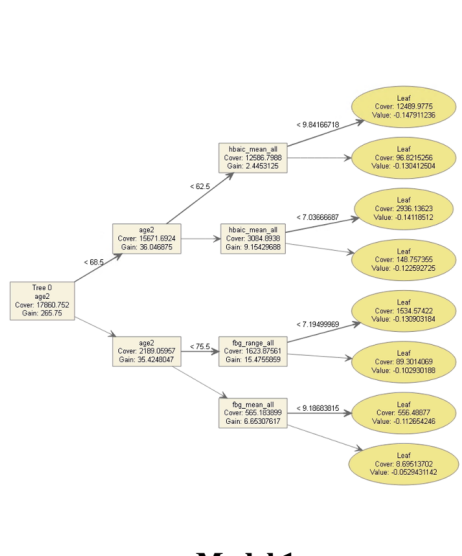

Model 1

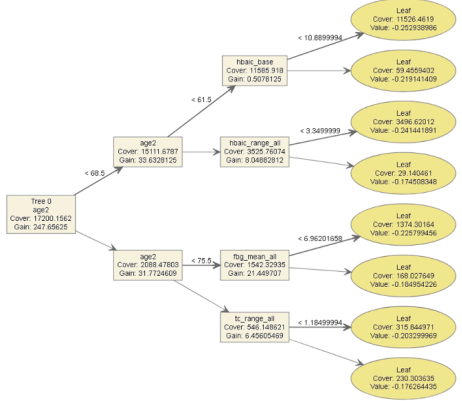

Model 4

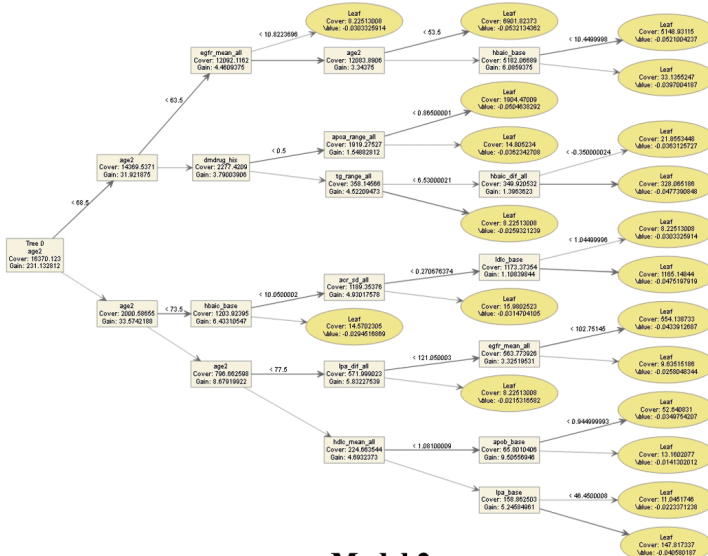

Model 2

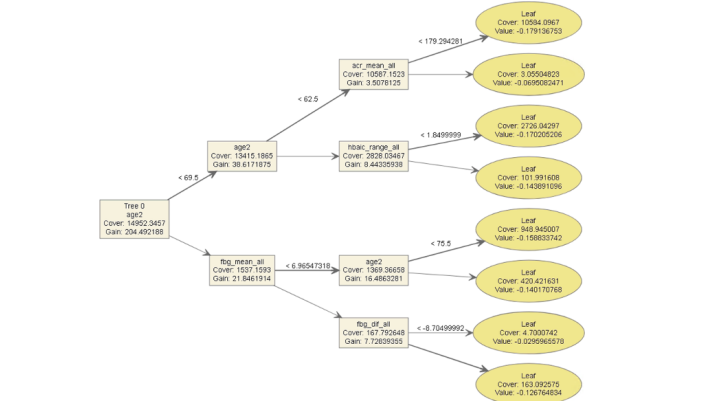

Model 5

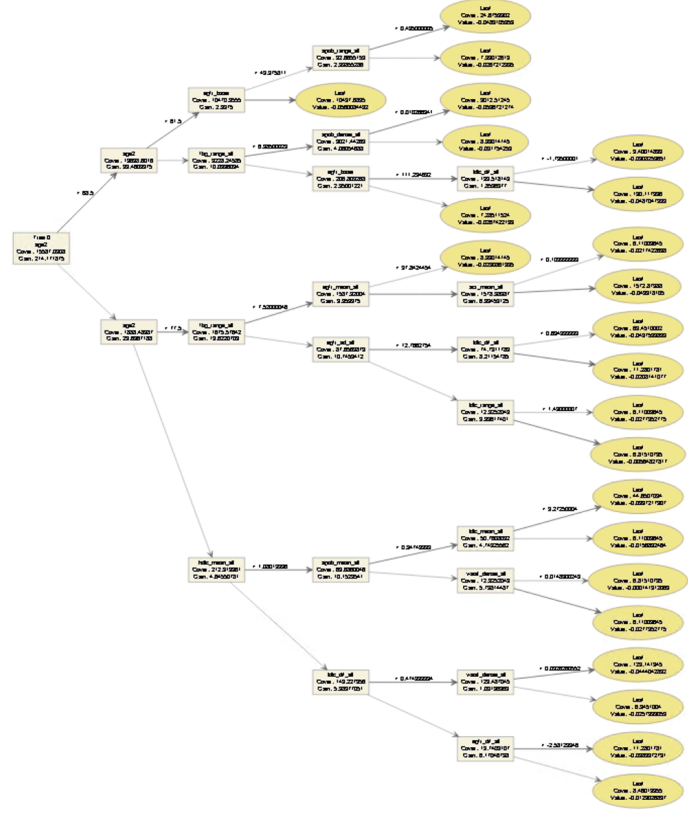

Model 3

**Supplementary Table S10 Fifteen  $\beta$  coefficients with largest absolute value in each LASSO regressions**

| <b>Predictor</b>                                                  | <b><math>\beta</math> coefficients</b> | <b>Odds ratio</b> |
|-------------------------------------------------------------------|----------------------------------------|-------------------|
| <b>Model 1</b>                                                    |                                        |                   |
| Age                                                               | 0.9861                                 | 2.681             |
| Anti-hypertension treatment                                       | 0.1713                                 | 1.187             |
| Female                                                            | -0.0830                                | 0.920             |
| Family history of ASCVD                                           | 0.0708                                 | 1.073             |
| Baseline diabetes                                                 | 0.0708                                 | 1.073             |
| Fifth quintile of mean fasting blood glucose                      | 0.0617                                 | 1.064             |
| Aspirin treatment history                                         | 0.0593                                 | 1.061             |
| Missing of education records                                      | -0.0526                                | 0.949             |
| Baseline systolic blood pressure                                  | 0.0457                                 | 1.047             |
| Fifth quintile of the standard deviation of fasting blood glucose | 0.0398                                 | 1.041             |
| Baseline HDLC                                                     | -0.0330                                | 0.968             |
| Second quintile of baseline LDLC                                  | -0.0322                                | 0.968             |
| Fifth quintile of mean triglycerides                              | 0.0287                                 | 1.029             |
| Fourth quintile of mean fasting blood glucose                     | 0.0278                                 | 1.028             |
| Third quintile of baseline eGFR                                   | -0.0276                                | 0.973             |
| <b>Model 2</b>                                                    |                                        |                   |
| Age                                                               | 0.9854                                 | 2.679             |
| Anti-hypertension treatment                                       | 0.1708                                 | 1.186             |
| Female                                                            | -0.0827                                | 0.921             |
| Family history of ASCVD                                           | 0.0707                                 | 1.073             |
| Baseline diabetes                                                 | 0.0704                                 | 1.073             |
| Fifth quintile of mean fasting blood glucose                      | 0.0617                                 | 1.064             |
| Aspirin treatment history                                         | 0.0592                                 | 1.061             |
| Missing of education records                                      | -0.0518                                | 0.950             |
| Baseline systolic blood pressure                                  | 0.0454                                 | 1.046             |
| Fifth quintile of the standard deviation of fasting blood glucose | 0.0401                                 | 1.041             |
| Baseline HDLC                                                     | -0.0326                                | 0.968             |
| Second quintile of baseline LDLC                                  | -0.0322                                | 0.968             |
| Fifth quintile of mean triglycerides                              | 0.0286                                 | 1.029             |
| Fourth quintile of mean fasting blood glucose                     | 0.0275                                 | 1.028             |
| Fifth quintile of mean ApoB                                       | 0.0274                                 | 1.028             |
| <b>Model 3</b>                                                    |                                        |                   |
| Age                                                               | 0.9854                                 | 2.679             |
| Anti-hypertension treatment                                       | 0.1708                                 | 1.186             |
| Female                                                            | -0.0827                                | 0.921             |
| Family history of ASCVD                                           | 0.0707                                 | 1.073             |
| Baseline diabetes                                                 | 0.0704                                 | 1.073             |
| Fifth quintile of mean fasting blood glucose                      | 0.0617                                 | 1.064             |
| Aspirin treatment history                                         | 0.0592                                 | 1.061             |
| Missing of education records                                      | -0.0518                                | 0.950             |

**Supplementary Table S10 (Continued)  $\beta$  coefficients of the LASSO regression**

| <b>Predictor</b>                                                  | <b><math>\beta</math> coefficients</b> | <b>Odds ratio</b> |
|-------------------------------------------------------------------|----------------------------------------|-------------------|
| Baseline systolic blood pressure                                  | 0.0454                                 | 1.046             |
| Fifth quintile of the standard deviation of fasting blood glucose | 0.0401                                 | 1.041             |
| Baseline HDLC                                                     | -0.0326                                | 0.968             |
| Second quintile of baseline LDLC                                  | -0.0322                                | 0.968             |
| Fifth quintile of mean triglycerides                              | 0.0286                                 | 1.029             |
| Fourth quintile of mean fasting blood glucose                     | 0.0275                                 | 1.028             |
| Fifth quintile of mean ApoB                                       | 0.0274                                 | 1.028             |
| <b>Model 4</b>                                                    |                                        |                   |
| Age                                                               | 0.9817                                 | 2.669             |
| Anti-hypertension treatment                                       | 0.1681                                 | 1.183             |
| Female                                                            | -0.0813                                | 0.922             |
| Family history of ASCVD                                           | 0.0699                                 | 1.072             |
| Baseline diabetes                                                 | 0.0698                                 | 1.072             |
| Fifth quintile of mean fasting blood glucose                      | 0.0617                                 | 1.064             |
| Aspirin treatment history                                         | 0.0583                                 | 1.060             |
| Missing of education records                                      | -0.0472                                | 0.954             |
| Baseline systolic blood pressure                                  | 0.0440                                 | 1.045             |
| Fifth quintile of the standard deviation of fasting blood glucose | 0.0413                                 | 1.042             |
| Second quintile of baseline LDLC                                  | -0.0322                                | 0.968             |
| Baseline HDLC                                                     | -0.0306                                | 0.970             |
| Fifth quintile of mean triglycerides                              | 0.0280                                 | 1.028             |
| Fifth quintile of mean ApoB                                       | 0.0269                                 | 1.027             |
| Fourth quintile of mean fasting blood glucose                     | 0.0264                                 | 1.027             |
| <b>Model 5</b>                                                    |                                        |                   |
| Age                                                               | 0.9847                                 | 2.677             |
| Anti-hypertension treatment                                       | 0.1703                                 | 1.186             |
| Female                                                            | -0.0825                                | 0.921             |
| Family history of ASCVD                                           | 0.0705                                 | 1.073             |
| Baseline diabetes                                                 | 0.0702                                 | 1.073             |
| Fifth quintile of mean fasting blood glucose                      | 0.0617                                 | 1.064             |
| Aspirin treatment history                                         | 0.0590                                 | 1.061             |
| Missing of education records                                      | -0.0509                                | 0.950             |
| Baseline systolic blood pressure                                  | 0.0452                                 | 1.046             |
| Fifth quintile of the standard deviation of fasting blood glucose | 0.0403                                 | 1.041             |
| Second quintile of baseline LDLC                                  | -0.0322                                | 0.968             |
| Baseline HDLC                                                     | -0.0322                                | 0.968             |
| Fifth quintile of mean triglycerides                              | 0.0285                                 | 1.029             |
| Fourth quintile of mean fasting blood glucose                     | 0.0273                                 | 1.028             |
| Fifth quintile of mean ApoB                                       | 0.0273                                 | 1.028             |



Supplementary Figure S4 Decision curve analysis of the ML models

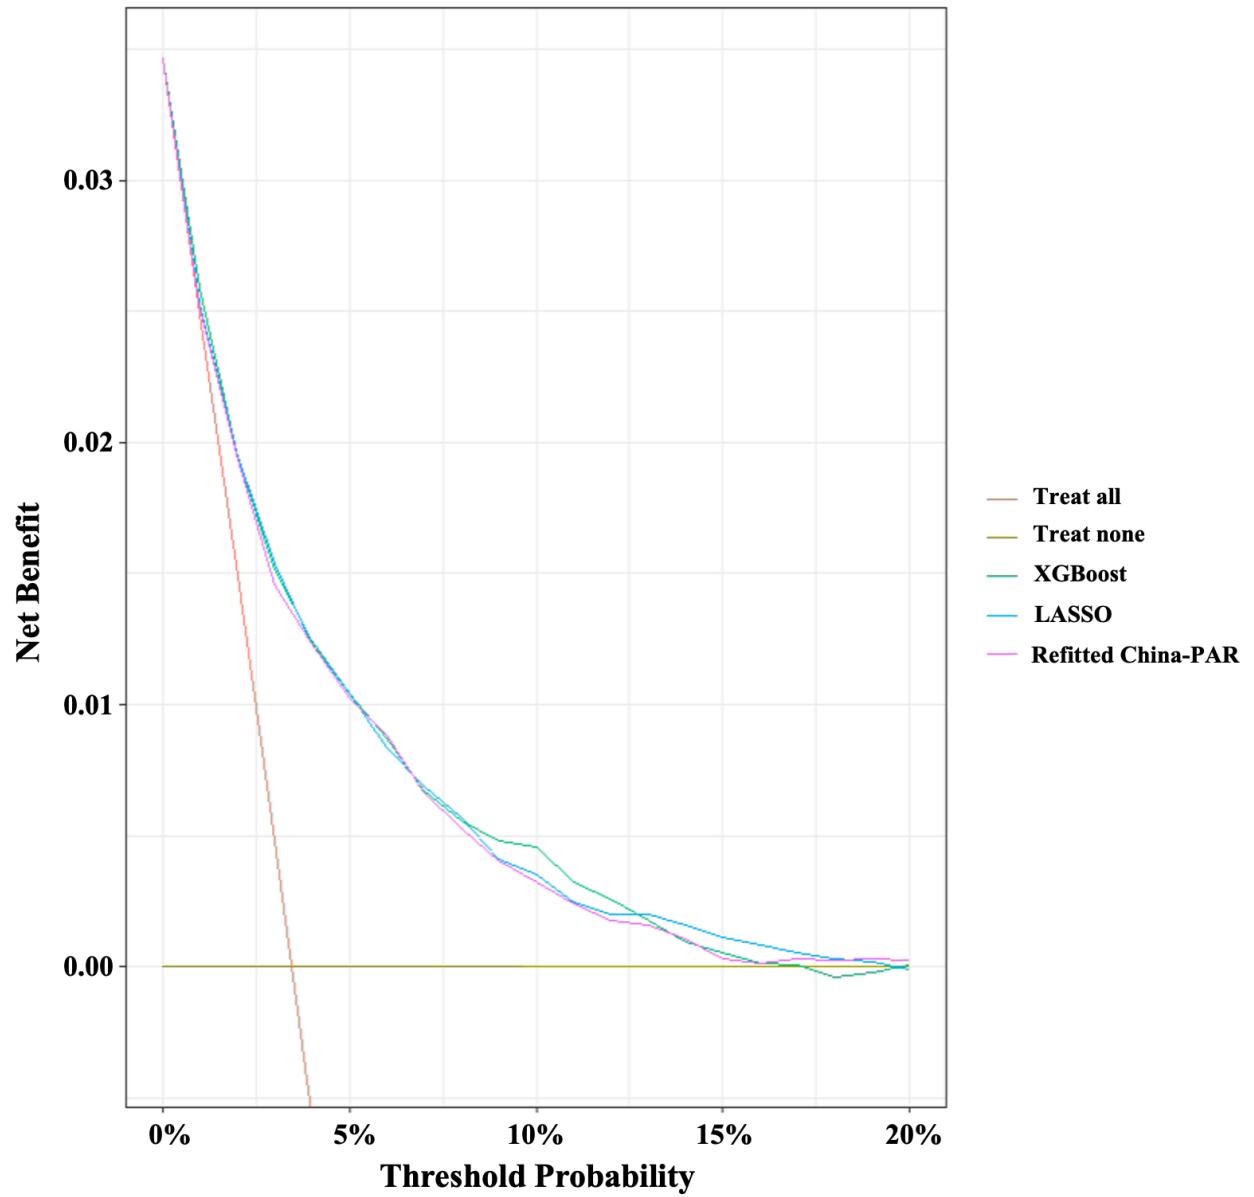

**Supplementary Table S11 Associations between predictors and ASCVDa**

|                             | Baseline         | Repeated measurements-based Variables |                  |                    |                  |                                                |
|-----------------------------|------------------|---------------------------------------|------------------|--------------------|------------------|------------------------------------------------|
|                             |                  | Number of measurements                | Mean             | Standard deviation | Range            | Difference between first and last measurements |
| <b>China-PAR predictors</b> |                  |                                       |                  |                    |                  |                                                |
| Women                       | 0.81 (0.77-0.86) |                                       |                  |                    |                  |                                                |
| Age                         | 1.11 (1.11-1.11) |                                       |                  |                    |                  |                                                |
| Current smoker              | 1.12 (1.05-1.19) |                                       |                  |                    |                  |                                                |
| Diabetes                    | 1.68 (1.58-1.78) |                                       |                  |                    |                  |                                                |
| Urban                       | 0.93 (0.88-0.98) |                                       |                  |                    |                  |                                                |
| Family history of ASCVD     | 2.69 (2.27-3.19) |                                       |                  |                    |                  |                                                |
| Waist circumference         | 1.00 (1.00-1.00) | 1.11 (1.04-1.19)                      | 0.90 (0.79-1.02) | 1.21 (1.11-1.31)   | 1.15 (1.07-1.24) | 1.20 (1.02-1.42)                               |
| SBP                         | 1.00 (1.00-1.01) | 1.23 (1.15-1.30)                      | 1.32 (1.20-1.46) | 1.33 (1.21-1.47)   | 1.26 (1.17-1.36) | 0.76 (0.49-1.19)                               |
| TC                          | 1.08 (1.05-1.11) | 1.43 (0.97-2.11)                      | 1.19 (1.02-1.39) | 1.31 (1.20-1.43)   | 1.26 (1.15-1.37) | 0.73 (0.58-0.90)                               |
| HDL-C                       | 0.75 (0.69-0.81) | 1.10 (1.03-1.17)                      | 0.76 (0.69-0.83) | 1.14 (1.04-1.25)   | 1.23 (1.11-1.36) | 0.81 (0.62-0.83)                               |
| Hypertension                | 1.39 (1.31-1.47) |                                       |                  |                    |                  |                                                |
| <b>Other predictors</b>     |                  |                                       |                  |                    |                  |                                                |
| Demography                  |                  |                                       |                  |                    |                  |                                                |
| Education level             | 0.67 (0.57-0.78) |                                       |                  |                    |                  |                                                |
| Blood pressure              |                  |                                       |                  |                    |                  |                                                |
| DBP                         | 1.76 (1.02-3.05) | 1.23 (1.16-1.31)                      | 1.31 (1.19-1.46) | 1.21 (1.10-1.29)   | 1.19 (1.10-1.29) | 2.30 (0.74-7.13)                               |
| Obesity                     |                  |                                       |                  |                    |                  |                                                |
| BMI                         | 0.89 (0.79-0.99) | 1.17 (1.10-1.25)                      | 1.14 (1.05-1.24) | 1.21 (1.11-1.32)   | 1.17 (1.09-1.25) | 1.35 (1.05-1.75)                               |
| Lipid metabolism            |                  |                                       |                  |                    |                  |                                                |
| TG                          | 1.95 (1.15-3.32) | 1.09 (1.02-1.16)                      | 1.18 (1.05-1.33) | 1.10 (1.01-1.19)   | 1.20 (1.07-1.34) | 0.70 (0.55, 0.89)                              |
| LDL-C                       | 0.79 (0.72-0.87) | 1.11 (1.04-1.18)                      | 0.86 (0.79-0.94) | 1.31 (1.20-1.43)   | 1.94 (1.52-2.48) | 0.84 (0.72-0.98)                               |
| Apo-A                       | 0.77 (0.60-1.00) | 0.85 (0.80-0.90)                      | 0.67 (0.60-0.74) | 1.22 (1.06-1.40)   | 1.47 (1.17-1.84) | 0.79 (0.56-1.12)                               |
| Apo-B                       | 0.78 (0.66-0.92) | 0.85 (0.80-0.90)                      | 0.80 (0.72-0.88) | 1.30 (1.13-1.50)   | 1.24 (1.09-1.41) | 0.79 (0.57-1.09)                               |
| Lp-(a)                      | 0.80 (0.75-0.86) | 0.82 (0.77-0.87)                      | 0.84 (0.77-0.92) | 1.32 (1.11-1.57)   | 0.84 (0.75-0.94) | 0.72 (0.61-0.85)                               |

**Supplementary Table S11 Associations between predictors and ASCVD (continued)<sup>a</sup>**

|                    | Baseline         | Repeated measurements-based Variables |                  |                    |                  | Difference between first and last measurements |
|--------------------|------------------|---------------------------------------|------------------|--------------------|------------------|------------------------------------------------|
|                    |                  | Number of measurements                | Mean             | Standard deviation | Range            |                                                |
| Glucose metabolism |                  |                                       |                  |                    |                  |                                                |
| FBG                | 3.46 (2.60-4.59) | 1.06 (0.99-1.13)                      | 1.89 (1.69-2.10) | 1.72 (1.55-1.90)   | 2.02 (1.75-2.34) | 0.48 (0.40-0.58)                               |
| HbA1c              | 2.43 (1.97-3.00) | 0.70 (0.63-0.78)                      | 1.98 (1.65-2.38) | 1.47 (1.14-1.89)   | 1.66 (1.23-2.24) | 0.43 (0.29-0.66)                               |
| Renal function     |                  |                                       |                  |                    |                  |                                                |
| eGFR               | 0.66 (0.60-0.72) | 5.24 (2.72-10.08)                     | 0.82 (0.77-0.88) | 1.37 (1.22-1.55)   | 1.52 (1.35-1.72) | 0.74 (0.67-0.81)                               |
| ACR                | 2.62 (1.93-3.54) | 0.68 (0.58-0.81)                      | 2.28 (1.72-3.03) | 2.75 (1.66-4.55)   | 2.20 (1.31-3.69) | 0.61 (0.41-0.91)                               |
| Medication         |                  |                                       |                  |                    |                  |                                                |
| Hyperlipidemia     | 1.03 (0.97-1.10) |                                       |                  |                    |                  |                                                |
| Hyperglycemia      | 0.91 (0.79-1.06) |                                       |                  |                    |                  |                                                |
| Aspirin            | 1.26 (1.18-1.34) |                                       |                  |                    |                  |                                                |

<sup>a</sup>The association between predictors in the China-PAR model was multi-variable adjusted for each other. The other predictors were individually adjusted for predictors in the China-PAR model. All the associations were estimated in the whole study population of 215,744.

## Supplementary Figure S5 The importance of predictors in the two ML models

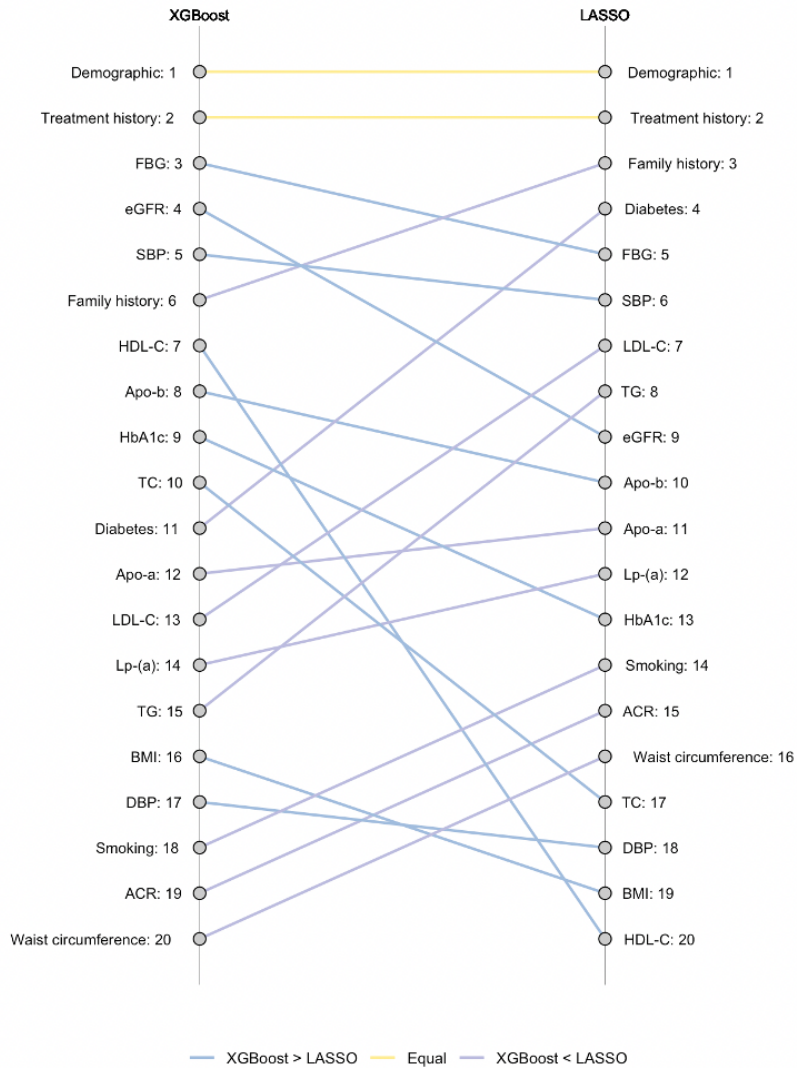

(a)

| No. | XGBoost                     | LASSO                       |
|-----|-----------------------------|-----------------------------|
| 1   | Age                         | Age                         |
| 2   | Anti-hypertension treatment | Anti-hypertension treatment |
| 3   | Mean of eGFR                | Sex                         |
| 4   | Mean of FBG                 | Family history of ASCVD     |
| 5   | Standard deviation of FBG   | Diabetes at baseline        |
| 6   | Baseline SBP                | Mean of FBG                 |
| 7   | Family history of ASCVD     | Aspirin use                 |
| 8   | Mean of HDL-C               | Education level             |
| 9   | Mean of HbA1c               | Baseline SBP                |
| 10  | Mean of Apo-b               | Standard deviation of FBG   |

(b)

(a) The minimum rank of importance in each kind of measurement by models. (b) Top 10 irrelevant important predictors in the two ML models. Predictors with a correlation coefficient larger than 0.7 were not counted.

**Supplementary Table S12 The differences of C statistics between ML models and Cox model with all the baseline measurements<sup>a</sup>**

| Sex     | Model                                    | C statistics (95% CI)   | Difference in C statistics        | P             |
|---------|------------------------------------------|-------------------------|-----------------------------------|---------------|
| Overall | Cox model with all baseline measurements | 0.7861 (0.7718, 0.8007) | Reference                         |               |
|         | LASSO regression                         | 0.7883 (0.7737, 0.8029) | 0.00214 (-0.00088, 0.00515)       | 0.1654        |
|         | XGBoost model                            | 0.7918 (0.7776, 0.8060) | <b>0.00563 (0.00118, 0.01009)</b> | <b>0.0133</b> |
| Men     | Cox model with all baseline measurements | 0.7614 (0.7408, 0.7820) | Reference                         |               |
|         | LASSO regression                         | 0.7623 (0.7415, 0.7831) | 0.00091 (-0.00340, 0.00522)       | 0.6788        |
|         | XGBoost model                            | 0.7700 (0.7502, 0.7898) | <b>0.00860 (0.00183, 0.01536)</b> | <b>0.0128</b> |
| Women   | Cox model with all baseline measurements | 0.8040 (0.7829, 0.8251) | Reference                         |               |
|         | LASSO regression                         | 0.8077 (0.7866, 0.8287) | 0.00365 (-0.00057, 0.00788)       | 0.0904        |
|         | XGBoost model                            | 0.8071 (0.7861, 0.8281) | 0.00309 (-0.00286, 0.00903)       | 0.3081        |

<sup>a</sup>The results were given based on the validation set of 31,544.

### Supplementary Figure S6 Calibration plots of models in sensitivity analysis<sup>a</sup>

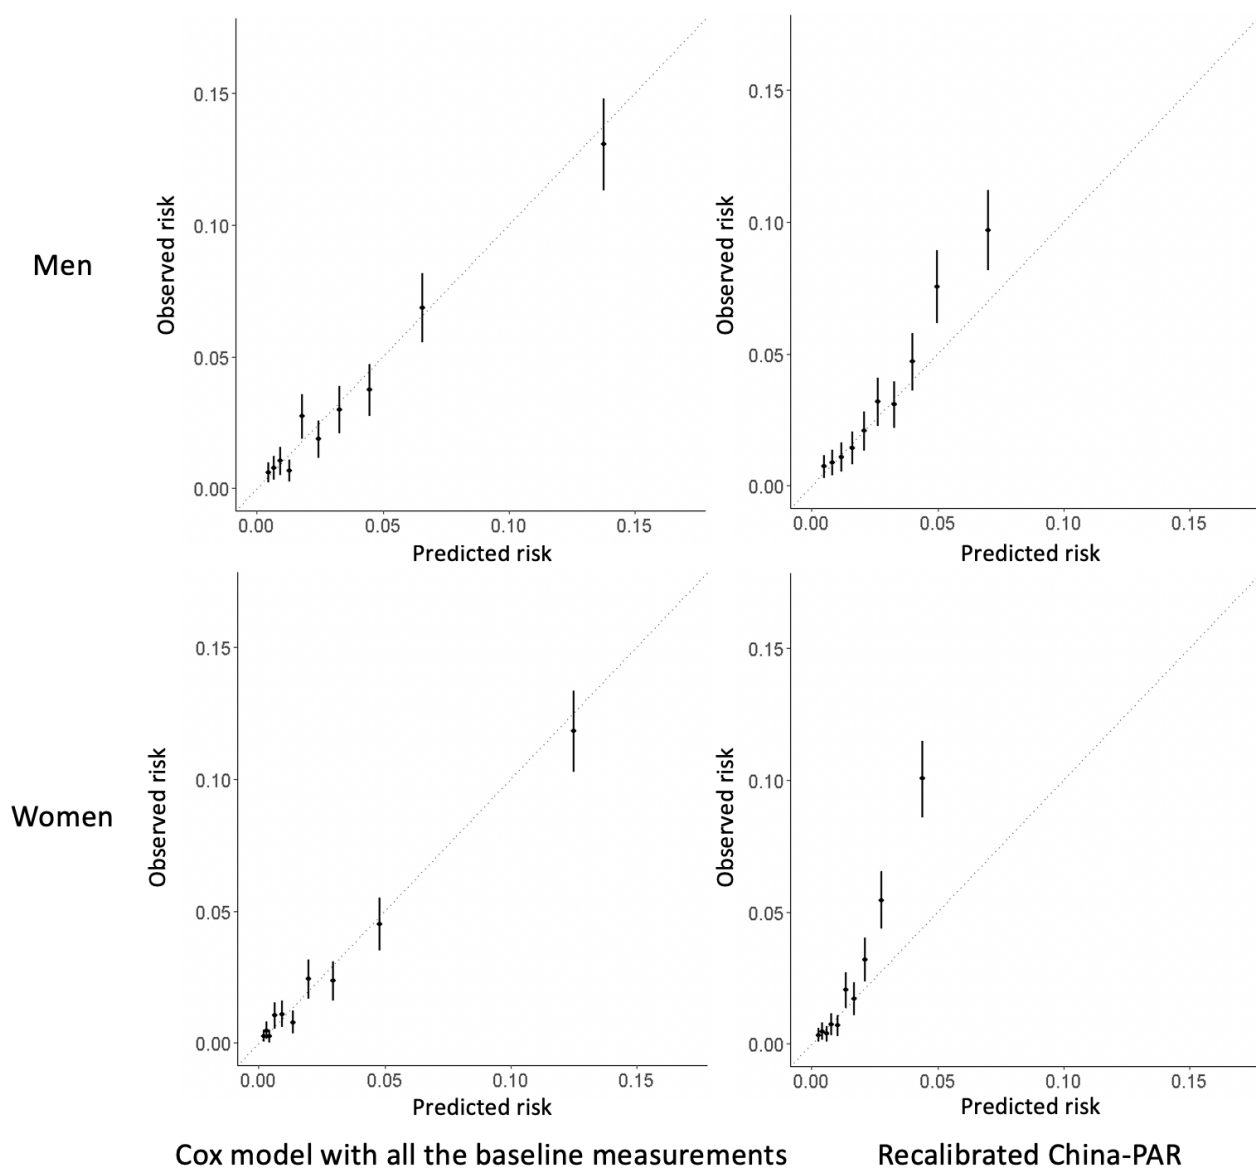

<sup>a</sup>The results were given based on the validation set of 31,544.

**Supplementary Table S13 The difference in C statistic between ML models and recalibrated China-PAR model<sup>a</sup>**

| <b>Sex</b> | <b>Model</b>                 | <b>C statistics (95% CI)</b> | <b>Difference in C statistics</b> | <b>P</b>          |
|------------|------------------------------|------------------------------|-----------------------------------|-------------------|
| Overall    | Recalibrated China-PAR model | 0.7513 (0.7369, 0.7657)      | Reference                         |                   |
|            | LASSO regression             | 0.7883 (0.7737, 0.8029)      | <b>0.03670 (0.02906, 0.04487)</b> | <b>&lt;0.0001</b> |
|            | XGBoost model                | 0.7918 (0.7776, 0.8060)      | <b>0.04047 (0.02605, 0.05488)</b> | <b>&lt;0.0001</b> |
| Men        | Recalibrated China-PAR model | 0.7226 (0.7017, 0.7434)      | Reference                         |                   |
|            | LASSO regression             | 0.7623 (0.7415, 0.7831)      | <b>0.03975 (0.02815, 0.05135)</b> | <b>&lt;0.0001</b> |
|            | XGBoost model                | 0.7700 (0.7502, 0.7898)      | <b>0.04744 (0.03512, 0.05976)</b> | <b>&lt;0.0001</b> |
| Women      | Recalibrated China-PAR model | 0.7836 (0.7629, 0.8044)      | Reference                         |                   |
|            | LASSO regression             | 0.8077 (0.7866, 0.8287)      | <b>0.02402 (0.01459, 0.03345)</b> | <b>&lt;0.0001</b> |
|            | XGBoost model                | 0.8071 (0.7861, 0.8281)      | <b>0.02345 (0.01300, 0.03392)</b> | <b>&lt;0.0001</b> |

<sup>a</sup>The results were given based on the validation set of 31,544.

## Supplementary Appendix The TRIPODS checklist for this study<sup>a</sup>

| Section/Topic                | Item | Checklist Item                                                                                                                                                                                       | Page                                                                                                                          |                               |
|------------------------------|------|------------------------------------------------------------------------------------------------------------------------------------------------------------------------------------------------------|-------------------------------------------------------------------------------------------------------------------------------|-------------------------------|
| Title and abstract           |      |                                                                                                                                                                                                      |                                                                                                                               |                               |
| Title                        | 1    | D;V Identify the study as developing and/or validating a multivariable prediction model, the target population, and the outcome to be predicted.                                                     | P1                                                                                                                            |                               |
| Abstract                     | 2    | D;V Provide a summary of objectives, study design, setting, participants, sample size, predictors, outcome, statistical analysis, results, and conclusions.                                          | P3                                                                                                                            |                               |
| Introduction                 |      |                                                                                                                                                                                                      |                                                                                                                               |                               |
| Background and objectives    | 3a   | D;V Explain the medical context (including whether diagnostic or prognostic) and rationale for developing or validating the multivariable prediction model, including references to existing models. | P5L13-<br>P6L3                                                                                                                |                               |
|                              | 3b   | D;V Specify the objectives, including whether the study describes the development or validation of the model or both.                                                                                | P6L5-9                                                                                                                        |                               |
| Methods                      |      |                                                                                                                                                                                                      |                                                                                                                               |                               |
| Source of data               | 4a   | D;V Describe the study design or source of data (e.g., randomized trial, cohort, or registry data), separately for the development and validation data sets, if applicable.                          | P6L13-23                                                                                                                      |                               |
|                              | 4b   | D;V Specify the key study dates, including start of accrual; end of accrual; and, if applicable, end of follow-up.                                                                                   | P6L25-<br>P7L3                                                                                                                |                               |
| Participants                 | 5a   | D;V Specify key elements of the study setting (e.g., primary care, secondary care, general population) including number and location of centres.                                                     | P6L13-16                                                                                                                      |                               |
|                              | 5b   | D;V Describe eligibility criteria for participants.                                                                                                                                                  | P6L16-20                                                                                                                      |                               |
|                              | 5c   | D;V Give details of treatments received, if relevant.                                                                                                                                                | NA                                                                                                                            |                               |
| Outcome                      | 6a   | D;V Clearly define the outcome that is predicted by the prediction model, including how and when assessed.                                                                                           | P8L3-9                                                                                                                        |                               |
|                              | 6b   | D;V Report any actions to blind assessment of the outcome to be predicted.                                                                                                                           | NA                                                                                                                            |                               |
| Predictors                   | 7a   | D;V Clearly define all predictors used in developing or validating the multivariable prediction model, including how and when they were measured.                                                    | P7L9-28                                                                                                                       |                               |
|                              | 7b   | D;V Report any actions to blind assessment of predictors for the outcome and other predictors.                                                                                                       | NA                                                                                                                            |                               |
| Sample size                  | 8    | D;V Explain how the study size was arrived at.                                                                                                                                                       | NA                                                                                                                            |                               |
| Missing data                 | 9    | D;V Describe how missing data were handled (e.g., complete-case analysis, single imputation, multiple imputation) with details of any imputation method.                                             | Supplemen-<br>tary<br>Method                                                                                                  |                               |
|                              | 10a  | D                                                                                                                                                                                                    | Describe how predictors were handled in the analyses.                                                                         | P8L19-23                      |
|                              | 10b  | D                                                                                                                                                                                                    | Specify type of model, all model-building procedures (including any predictor selection), and method for internal validation. | P8L19-<br>P9L1                |
| Statistical analysis methods | 10c  | V                                                                                                                                                                                                    | For validation, describe how the predictions were calculated.                                                                 | NA                            |
|                              | 10d  | D;V                                                                                                                                                                                                  | Specify all measures used to assess model performance and, if relevant, to compare multiple models.                           | P9L13-22                      |
|                              | 10e  | V                                                                                                                                                                                                    | Describe any model updating (e.g., recalibration) arising from the validation, if done.                                       | NA                            |
| Risk groups                  | 11   | D;V Provide details on how risk groups were created, if done.                                                                                                                                        | P9L21-22                                                                                                                      |                               |
| Development vs. validation   | 12   | V                                                                                                                                                                                                    | For validation, identify any differences from the development data in setting, eligibility criteria, outcome, and predictors. | Supplemen-<br>tary Table<br>6 |



## Supplementary Appendix The TRIPODS checklist for this study (continued)<sup>a</sup>

|                           |     |     |                                                                                                                                                                                                       |                                   |
|---------------------------|-----|-----|-------------------------------------------------------------------------------------------------------------------------------------------------------------------------------------------------------|-----------------------------------|
| Results                   |     |     |                                                                                                                                                                                                       |                                   |
|                           | 13a | D;V | Describe the flow of participants through the study, including the number of participants with and without the outcome and, if applicable, a summary of the follow-up time. A diagram may be helpful. | Figure 2, Table 1                 |
| Participants              | 13b | D;V | Describe the characteristics of the participants (basic demographics, clinical features, available predictors), including the number of participants with missing data for predictors and outcome.    | P10L14-21                         |
|                           | 13c | V   | For validation, show a comparison with the development data of the distribution of important variables (demographics, predictors and outcome).                                                        | Table 1                           |
|                           | 14a | D   | Specify the number of participants and outcome events in each analysis.                                                                                                                               | Table 1                           |
| Model development         | 14b | D   | If done, report the unadjusted association between each candidate predictor and outcome.                                                                                                              | P11L26-27, Supplementary Table 10 |
| Model specification       | 15a | D   | Present the full prediction model to allow predictions for individuals (i.e., all regression coefficients, and model intercept or baseline survival at a given time point).                           | NA                                |
|                           | 15b | D   | Explain how to use the prediction model.                                                                                                                                                              | NA                                |
| Model performance         | 16  | D;V | Report performance measures (with CIs) for the prediction model.                                                                                                                                      | P10L24-P11L23                     |
| Model-updating            | 17  | V   | If done, report the results from any model updating (i.e., model specification, model performance).                                                                                                   | NA                                |
| Discussion                |     |     |                                                                                                                                                                                                       |                                   |
| Limitations               | 18  | D;V | Discuss any limitations of the study (such as nonrepresentative sample, few events per predictor, missing data).                                                                                      | P15L2-11                          |
| Interpretation            | 19a | V   | For validation, discuss the results with reference to performance in the development data, and any other validation data.                                                                             | P13L4-P14L5, P14L19-28            |
|                           | 19b | D;V | Give an overall interpretation of the results, considering objectives, limitations, results from similar studies, and other relevant evidence.                                                        | P15L13-18                         |
| Implications              | 20  | D;V | Discuss the potential clinical use of the model and implications for future research.                                                                                                                 | P14L13-17                         |
| Other information         |     |     |                                                                                                                                                                                                       |                                   |
| Supplementary information | 21  | D;V | Provide information about the availability of supplementary resources, such as study protocol, Web calculator, and data sets.                                                                         | NA                                |
| Funding                   | 22  | D;V | Give the source of funding and the role of the funders for the present study.                                                                                                                         | P15L22-23                         |

<sup>a</sup>Items relevant only to the development of a prediction model are denoted by D, items relating solely to a validation of a prediction model are denoted by V, and items relating to both are denoted D;V. We recommend using the TRIPOD Checklist in conjunction with the TRIPOD Explanation and Elaboration document.

## Supplementary Method S1 Detailed description of the CHERRY study

The source data were from the CHinese Electronic health Records Research in Yinzhou (CHERRY) study, a longitudinal and population-based cohort study in China. The detailed study protocol and some findings on CVD have been previously published.<sup>1</sup> In short, the CHERRY study was established based on the integrated Health Information System in Yinzhou, a developed area in Eastern China. The system consists of various databases, e.g., Population Census and Registered Health Insurance Database, Health Check Database, Disease Management Database, Death and Disease Surveillance Database, and Electronic Medical Records (EMRs). Individual information about cardiovascular risk factors, clinical measurements, and outcomes from different databases were linked via a unique and encoded identifier.

### *Data collection on the Longitudinal measurement of cardiovascular risk factors*

Regarding the traditional CVD risk factors, local GPs in Yinzhou have built up an impressive scheme on frequent health checks among adults and regular epidemiological surveys as part of primary care routine services over the 10 years after China's healthcare reform was initially launched. CHERRY then includes longitudinal measurements of risk factors related to CVD at the individual level, e.g., smoking status, alcohol use, body mass index (BMI) and other obesity risk factors, and daily physical activity. Detailed description of longitudinal measurements was published in the original study protocol. We provided the information regarding the CVD risk prediction in this study as follows:

---

| <b>Predictors</b>                                 | <b>Measurement Methods</b>                                                                                                                                                                                                                                                                          |
|---------------------------------------------------|-----------------------------------------------------------------------------------------------------------------------------------------------------------------------------------------------------------------------------------------------------------------------------------------------------|
| Age at baseline in years, continuous              | Patients' ID numbers were derived from population census and registered health insurance database and their date of birth was then identified (which is recorded in this number as eight digits)                                                                                                    |
| Education level, categorical                      | Education level was acquired from population census and registered health insurance database.                                                                                                                                                                                                       |
| Body mass index in kg/m <sup>2</sup> , continuous | BMI was calculated as weight(kg)/height(m) <sup>2</sup> . Weight and height recorded on the same measurement date and in the same database were used in calculation. Information was mainly from the routine epidemiological survey, health checks, and disease surveillance and management system. |
| Blood pressure in mmHg, continuous                | This was measured by either a general practitioner (population census and registered health insurance database, disease manage database) or practice nurses (health checks database).                                                                                                               |

---

|                                                   |                                                                                                                                                                                                                                                                                                                                                                                                                                                                                                                                                                                                     |
|---------------------------------------------------|-----------------------------------------------------------------------------------------------------------------------------------------------------------------------------------------------------------------------------------------------------------------------------------------------------------------------------------------------------------------------------------------------------------------------------------------------------------------------------------------------------------------------------------------------------------------------------------------------------|
| Smoking status, categorical                       | Smoking status of patients were recorded in several databases, mainly including health checks database and population census and registered health insurance database. They were recorded as categorical variables (non-smoker, ex-smoker, current smoker) or continuous variables (number of cigarettes smoked per day) due to different design forms. These were combined into two categories indicating ever smoked or not.                                                                                                                                                                      |
| Glycemia, continuous                              | The HbA <sub>1c</sub> (%) and FBG (mmol/l) were recorded in disease management database, health checks database and inpatient EMR.                                                                                                                                                                                                                                                                                                                                                                                                                                                                  |
| Lipid profiles, continuous                        | Basic lipid profiles were measured in community laboratories or hospitals, health checks, and disease surveillance and management system. Novel markers like Apos and Lp(a) were extracted from EMR.                                                                                                                                                                                                                                                                                                                                                                                                |
| eGFR in ml/(min·1.73m <sup>2</sup> ), continuous  | The eGFR was calculated using the CKD-EPI equation. Serum creatinine level used in the equation was recorded in health checks database and inpatient EMR.                                                                                                                                                                                                                                                                                                                                                                                                                                           |
| ACR in mg/mmol, continuous                        | ACR was recorded in health checks database and inpatient EMR.                                                                                                                                                                                                                                                                                                                                                                                                                                                                                                                                       |
| Family History of ASCVD, categorical              | This variable was identified according to routine epidemiological survey of local GPs. The results were self-reported by the participants.                                                                                                                                                                                                                                                                                                                                                                                                                                                          |
| Blood pressure lowering medication, categorical   | Categories of blood pressure lowering medication included angiotensin converting enzyme (ACE) inhibitors, beta-blockers, thiazide, angiotensin II receptor blockers (ARB), calcium channel blockers, and alpha-blockers. If participants were prescribed blood pressure lowering medication prior to the study index assessment, they were classified as having blood pressure lowering medication. The information was extracted from disease management database, health checks database and inpatient EMR.                                                                                       |
| Lipid lowering medication, categorical            | Lipid-lowering medication includes statins, nicotinic acid, cholesterol absorption inhibitors, probucol, cholic acid chelating agent, fibrates. If participants were prescribed lipid lowering medication prior to the study index assessment, they were classified as having lipid lowering medication. The information was extracted from disease management database, health checks database and inpatient EMR.                                                                                                                                                                                  |
| Hypoglycaemic medication and insulin, categorical | Oral hypoglycaemic agents include biguanides, sulfonylureas, non-sulfonylurea derivatives of anisic acid, alpha-glucosidase inhibitors, thiazolidinediones, glucagon-like peptide 1 (GLP-1) receptor agonist, dipeptidyl peptidase IV (DPP-4) inhibitors and sodium glucose transporter 2 (SGLT2) inhibitors. If participants were prescribed hypoglycaemic medication or insulin before the study index assessment, they were classified as having lipid lowering medication or insulin. The information was extracted from disease management database, health checks database and inpatient EMR. |
| Aspirin treatment history                         | If participants were prescribed aspirin before the study index assessment, they were classified as having lipid lowering medication or insulin. The information was extracted from disease management database, health checks database and inpatient EMR.                                                                                                                                                                                                                                                                                                                                           |

### ***Quality control***

The major quality control procedures were listed as follows:

- (1) The validity and reliability of the data were first checked by the Yinzhou District Centre for Disease Control and Prevention. The integration of different data sources was conducted under uniformed processes following pre-defined criteria. Especially, in the CHERRY Study, for fatal outcomes, attribution of death refers to the primary cause provided by cause-specific mortality on death certificates in the health information system. Data undergo

annual quality assessments. The description of the death certificates has been reported previously.<sup>1</sup> For non-fatal outcomes, multiple sources exist in the system for the outcome definition, that is, disease management database (primary care), EMRs database (hospital care), health insurance database and disease surveillance database (disease registry). We define the disease surveillance database as the gold standard.

- (2) Standard data dictionary was pre-defined. Each variable was converted to the same unit and outliers were removed based on the **Supplementary Table S3**.
- (3) Conflicting data across different sources in EHR-based data exists in CHERRY. Multiple records with similar but slightly different times of diagnosis for one patient may be recorded from different sources owing to varying timing accuracy. Prioritisation of sources in terms of conflicting data will be set up. Disease surveillance was considered as the gold standard. Events for one patient within a certain time range will be considered a single event; the allowed time window is disease-specific.
- (4) Outpatient and inpatient EMRs, containing information of patients' healthcare services, laboratory tests and medications, were directly transferred to the integrated data platform.
- (5) Both individuals with and without health insurance can access the primary care and hospital services and therefore are all included in the system/study.
- (6) For patients receiving care outside Yinzhou (e.g., patients might go to famous hospitals in Shanghai for certain complex surgical procedures), major non-fatal events occurred (e.g., CVD and cancer) are tracked from both disease surveillance and chronic disease management systems.

### ***Potential biases of the data sources***

Different EHR sources can introduce various potential biases that need to be considered when conducting research.

We listed the major potential biases of data sources in our study as follows:

- (1) Selection Bias: By requesting the valid lipid measurements, there were 215,744 Chinese participants in this analysis set from all 1.05 million adults in the original CHERRY study. This then didn't represent the entire population. However, this may reflect the clinical practice under a real-world scenario where nowadays lipid measurements were generally required even using the traditional guidelines recommended models.
- (2) Healthcare Utilization Bias: EMR data source is primarily collected from individuals seeking medical care, which can lead to biased representations of certain health conditions or risk factors that are more likely to be captured

in clinical settings. This may be the case especially for novel risk factors, e.g., Lp (a) or BNP. In fact, the availability of these novel risk factors was indeed correlated with patients' health conditions and further associated with the outcome. By using machine learning algorithms to handle missingness in this situation, we are able to capture this information for CVD risk prediction.

- (3) Documentation Bias: Variability in data recording practices among healthcare providers can lead to inconsistencies and missing information, potentially skewing the dataset. In CHERRY, EMR information including all the laboratory test was directly copied to the integrated data platform. Repeated measurements also can help handle this problem.
- (4) Self-report bias: Similar to other epidemiological study, self-report bias may occur in the registration database and disease management database when individuals provide inaccurate information about themselves, especially for the lifestyle risk factors.

Finally, our study is based on regional data which cannot represent the Chinese population nationwide. However, as the aim of our study is to demonstrate the cardiovascular predictive value of repeated measurements when machine learning models were used, this may have limited influence in the conclusion of this research.

## **Supplementary Method S2 Imputation strategies to handle missing values in this study**

Missing values of the predictors from the China-PAR model (including sex, age, smoking, settings, systolic blood pressure, total cholesterol, high-density lipoprotein cholesterol, waist circumference, family history of ASCVD, and anti-hypertension medication) were imputed using multiple-imputation by chain equations (MICE) and five imputation sets were generated, which was a widely used approach in handling the missing values when analyzing the EHR data such as QResearch in the UK.<sup>2</sup> The continuous predictors were imputed using linear regression, which included all other predictors in the China-PAR model as predictors. The categorical predictors were imputed using logistic regression with the same predictors. The imputation was iterated five times, and no interaction terms were set in the imputation models. All the validations were performed in each imputation set, and the results were then pooled together based on Rubin's rules.<sup>3</sup> Under the consideration of informed presence, predictors other than those included in the China-PAR model were not imputed to leverage the potential information from the absence of the records. Missing values were kept unchanged in developing the XGBoost model because it could accommodate incomplete data by separating the missing values of a specific predictor into the left and right leaf nodes. However, to utilize the missing pattern of data in the construction of the LASSO regression model, continuous predictors with missing values were categorized based on the quintiles of their unique values, with missing values as a separate group. The strategies to handle missing values in different models were illustrated in the following figure.

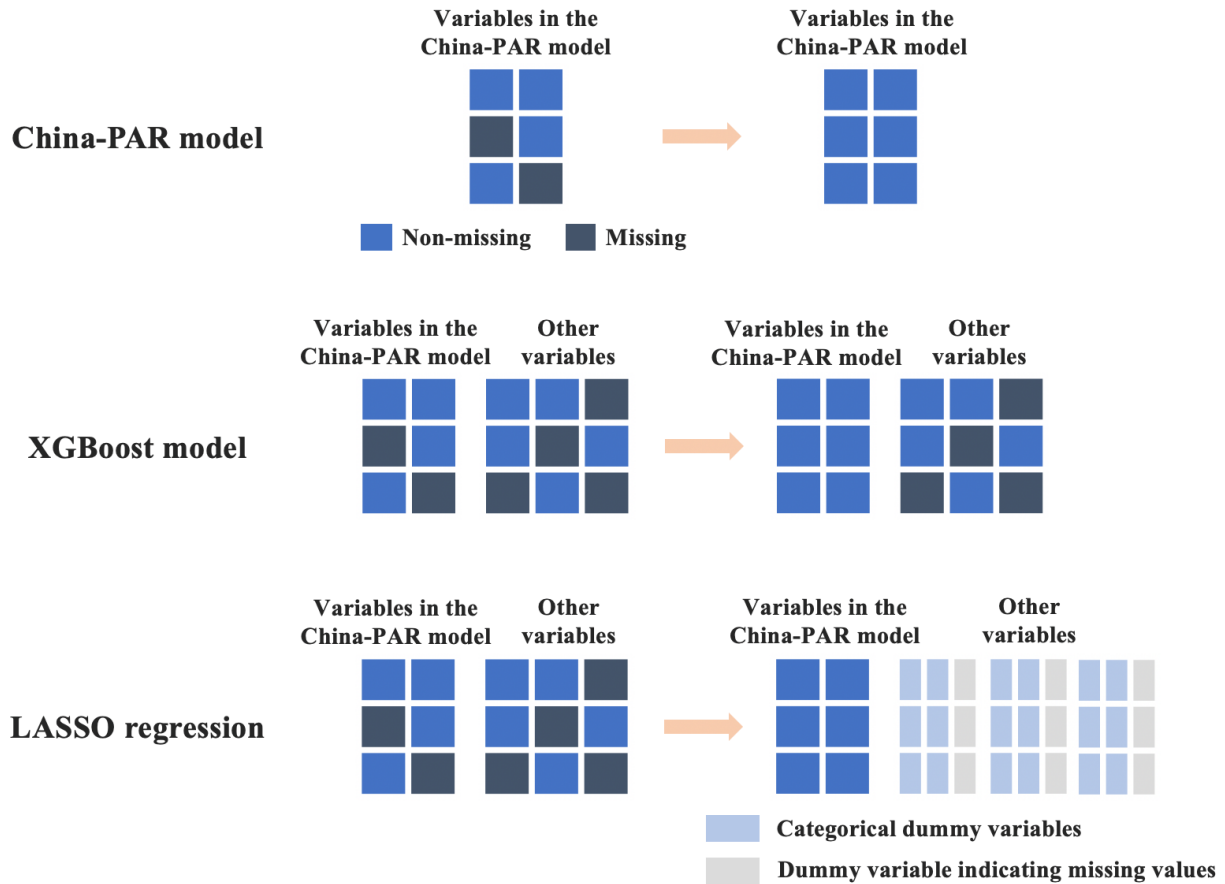

The strategies to handle the missing values in different models. In the China-PAR model, all the variables were multiple-imputed based on chain-equation. In the XGBoost model, variables from the China-PAR model were multiple-imputed using the same approach and other variables were kept the same with missing data since the XGBoost algorithm can accommodate missing values. In the Lasso regression, variables from the China-PAR model were handled with the same approach and other variables were categorized with a special dummy variable indicating missing of them.

### Supplementary Reference

1. Lin H, Tang X, Shen P, et al. Using big data to improve cardiovascular care and outcomes in China: a protocol for the CHinese Electronic health Records Research in Yinzhou (CHERRY) Study. *BMJ open* 2018; **8**(2): e019698.
2. Hippisley-Cox J, Coupland C, Brindle P. Development and validation of QRISK3 risk prediction algorithms to estimate future risk of cardiovascular disease: prospective cohort study. *bmj* 2017; **357**.
3. Harel O, Mitchell EM, Perkins NJ, et al. Multiple imputation for incomplete data in epidemiologic studies. *American journal of epidemiology* 2018; **187**(3): 576-84.
